# Supplementary material for: A substantial fraction of phytoplankton-derived DON is resistant to degradation by a metabolically versatile, widely distributed marine bacterium
Source: PLoS One. 2017 Feb 3;12(2):e0171391. doi: 10.1371/journal.pone.0171391 (PMC5291467; doi:10.1371/journal.pone.0171391)
Supplement: S2 Dataset — (XLSX) [file pone.0171391.s002.xlsx]

## Sheet: DATA_PAPER
Experimental data used un Fig2. Unit for DOC, DON, POC and PON are mmol L-1. DOC:DON and POC:PON ratios are given in mol mol-1
days	DOC	DOC(sd)	DON	DON(sd)	DOC:DON	DOC:DON(st)	POC	POC(sd)	PON	PON(sd)	POC:PON	POC:PON(sd)
0	1534.4	77.6	66.2	0.5	23.2	1.3	10	2	3	0	3.3	0.5
4	1048.9	91.1	42.7	2.1	24.6	2.4	308	69	45	9	7.3	0.6
7	1013.2	96.6	46.2	0.7	22	2.4	316	24	38	4	8.5	0.6
11	839.2	130.6	44.9	0.8	18.7	3.1	308	39	35	3	8.6	0.9
14	643.3	141.7	43.6	1.8	14.7	2.8	315	31	34	4	9.1	1
28	446.4	77.5	43.3	2.9	10.3	1.7	242	33	35	6	7.1	0.9
46	354.4	38	49.4	1	7.2	0.7	190	23	34	5	5.1	0.4
56	377	45.6	44.3	0.9	8.5	0.9	168	26	34	5	5	0.4
64	469.6	12	43.5	0.5	10.8	0.4	153	6	31	2	5	0.3
70	414.9	30.3	44.5	0.6	9.3	0.8	154	13	33	5	4.4	0.3
